# Supplementary material for: Assessing the causal role of immune traits in rheumatoid arthritis by bidirectional Mendelian randomization analysis
Source: Aging (Albany NY). 2024 May 16;16(10):8687–96. doi: 10.18632/aging.205833 (PMC11164524; doi:10.18632/aging.205833)
Supplement: Supplementary Table 1 [file aging-16-205833-s001.xlsx]

## Sheet: Sheet1
Supplementary Table 1. MR results of all immune traits identified in MR analysis.
Trait type	Panel	Statistical trait name	Trait	GWAS catalog accession number	NSNP	BETA	SE	p-val	OR	OR-L95%CI	OR-U95%CI
Relative count	B cell	BC_Trait33	IgD- CD24- %B cell	GCST90001413	15	0.0415618	0.0153232	0.00668077	1.04244	1.0116	1.07422
Relative count	cDC	DC_Trait531	CD11c+ CD62L- monocyte %monocyte	GCST90001453	17	-0.0644813	0.0286009	0.0241634	0.937554	0.886442	0.991612
Relative count	Treg	f_Treg_Trait523	Activated & resting Treg %CD4+	GCST90001500	26	-0.0316341	0.0141506	0.0253829	0.968861	0.942359	0.996109
Relative count	Maturation stages of T cell	MT_Trait533	TD CD8br %T cell	GCST90001559	17	0.0455525	0.0178347	0.0106446	1.04661	1.01065	1.08384
Relative count	Monocyte	N_MONO_Trait514	CD14- CD16+ monocyte %monocyte	GCST90001584	22	-0.0531703	0.0234851	0.0235739	0.948218	0.905561	0.992886
Relative count	Monocyte	N_MONO_Trait515	CD14+ CD16+ monocyte %monocyte	GCST90001585	23	-0.043526	0.0205975	0.034586	0.957408	0.919526	0.99685
Relative count	Monocyte	N_MONO_Trait516	CD14+ CD16- monocyte %monocyte	GCST90001586	24	0.0265698	0.00981697	0.00679939	1.02693	1.00736	1.04688
Relative count	Treg	Treg_Trait574	CD28- CD8dim %T cell	GCST90001661	24	-0.0301753	0.0149696	0.043824	0.970275	0.942221	0.999165
Morphological parameter	TBNK	FSC.TBNK.trait9	FSC-A on HLA DR+ CD8br	GCST90001978	16	-0.0215035	0.0109421	0.0493899	0.978726	0.957959	0.999943
MFI	B cell	Bcells.trait309	CD19 on IgD+ CD24-	GCST90001725	25	-0.0172021	0.00872374	0.0486249	0.982945	0.966281	0.999896
MFI	B cell	Bcells.trait311	CD19 on IgD+ CD38- naive	GCST90001727	19	-0.0267545	0.00855371	0.00176106	0.9736	0.957414	0.990061
MFI	B cell	Bcells.trait332	CD19 on IgD+	GCST90001741	27	-0.0171886	0.00856786	0.0448383	0.982958	0.966589	0.999605
MFI	B cell	Bcells.trait448	CD24 on memory B cell	GCST90001771	29	-0.0261931	0.0106703	0.0140973	0.974147	0.953986	0.994735
MFI	Treg	Blue.530.30.Treg.trait12	CD3 on CD39+ activated Treg	GCST90001854	25	-0.0401752	0.0157411	0.0107029	0.960621	0.931436	0.990721
MFI	Maturation stages of T cell	HVEM1000_150630.trait5	HVEM on EM CD4+	GCST90001878	20	-0.0428811	0.0168627	0.0109921	0.958025	0.926879	0.990218
MFI	Maturation stages of T cell	Blue.670.LP.MT.trait3	CCR7 on naive CD8br	GCST90001908	24	0.0356466	0.0157023	0.0231981	1.03629	1.00488	1.06868
MFI	TBNK	Blue.670.LP.TBNK.trait5	CD45 on CD8br	GCST90001917	25	0.0110489	0.00435673	0.0112113	1.01111	1.00251	1.01978
MFI	cDC	Red.660.20.cDC.trait5	CCR2 on monocyte	GCST90002017	25	-0.0550681	0.0163289	0.000745092	0.946421	0.91661	0.977201
MFI	Maturation stages of T cell	Red.660.20.MT.trait2	CD4 on CM CD4 +	GCST90002023	15	-0.0400157	0.0195821	0.0410049	0.960774	0.924598	0.998367
MFI	Maturation stages of T cell	Red.660.20.MT.trait6	CD4 on CD45RA+ CD4+	GCST90002027	26	-0.0377836	0.0164348	0.0215048	0.962921	0.932398	0.994444
MFI	Treg	Red.660.20.Treg.trait1	CD39 on CD39+ CD8br	GCST90002029	23	-0.0445007	0.0209273	0.0334662	0.956475	0.918036	0.996523
MFI	cDC	Red.780.60.cDC.trait6	CD80 on granulocyte	GCST90002040	32	0.0291578	0.014391	0.0427531	1.02959	1.00095	1.05904
MFI	Myeloid cell	Red.780.60.MDSC.trait5	CD45 on CD33dim HLA DR-	GCST90002050	17	-0.035737	0.0156876	0.0227244	0.964894	0.935677	0.995023
MFI	Maturation stages of T cell	Violet.450.50.MT.trait4	CD45RA on TD CD8br	GCST90002101	14	-0.0877666	0.0253792	0.000543767	0.915975	0.871526	0.96269
Absolute count	B cell	BC_Trait12	IgD+ CD38dim AC	GCST90001394	24	0.0205852	0.00776592	0.00803228	1.0208	1.00538	1.03646
Absolute count	B cell	BC_Trait36	IgD+ CD24- AC	GCST90001416	21	0.0179117	0.00832183	0.0313683	1.01807	1.0016	1.03481
Absolute count	cDC	f_DC_Trait502	Myeloid DC AC	GCST90001458	23	0.0428087	0.0126078	0.000685264	1.04374	1.01826	1.06985
Absolute count	cDC	f_DC_Trait505	DC AC	GCST90001461	19	0.0461813	0.0212615	0.0298508	1.04726	1.00452	1.09183
Absolute count	cDC	f_DC_Trait516	CD62L- myeloid DC AC	GCST90001468	16	0.0515163	0.0204372	0.0117117	1.05287	1.01153	1.0959
Absolute count	cDC	f_DC_Trait520	CD62L- CD86+ myeloid DC AC	GCST90001472	19	0.0369623	0.0150355	0.0139578	1.03765	1.00752	1.06869
Absolute count	Myeloid cell	MDSC_Trait27	CD33dim HLA DR+ CD11b- AC	GCST90001527	27	0.0218814	0.0097215	0.0243966	1.02212	1.00283	1.04178
Absolute count	Myeloid cell	MDSC_Trait3	CD66b++ myeloid cell AC	GCST90001529	16	0.0448576	0.0179893	0.0126463	1.04588	1.00964	1.08341
Absolute count	Monocyte	N_MONO_Trait501	CD14- CD16+ monocyte AC	GCST90001579	17	-0.0369666	0.0137874	0.00733612	0.963708	0.938015	0.990106
Absolute count	TBNK	TB_Trait569	HLA DR+ NK AC	GCST90001648	16	-0.0563224	0.0232093	0.0152362	0.945234	0.903199	0.989226
