# Supplementary material for: Assessing the causal role of immune traits in rheumatoid arthritis by bidirectional Mendelian randomization analysis
Source: Aging (Albany NY). 2024 May 16;16(10):8687–96. doi: 10.18632/aging.205833 (PMC11164524; doi:10.18632/aging.205833)
Supplement: Supplementary Table 2 [file aging-16-205833-s002.xlsx]

## Sheet: Sheet1
Supplementary Table 2. Sensitive analysis for causal associations of identified immune traits on RA risk.
Trait	Id	IVW						MR-Egger						Weighted median						Simple mode						Weighted mode
		BETA	SE	p-val	OR	OR-L95%CI	OR-U95%CI	BETA	SE	p-val	OR	OR-L95%CI	OR-U95%CI	BETA	SE	p-val	OR	OR-L95%CI	OR-U95%CI	BETA	SE	p-val	OR	OR-L95%CI	OR-U95%CI	BETA	SE	p-val	OR	OR-L95%CI	OR-U95%CI
IgD+ CD38dim AC	ebi-a-GCST90001394	0.0205852	0.00776592	0.00803228	1.0208	1.00538	1.03646	0.0217135	0.00918318	0.0272973	1.02195	1.00372	1.04051	0.0132976	0.0106773	0.212981	1.01339	0.992399	1.03482	0.0207614	0.0251761	0.418044	1.02098	0.971821	1.07262	0.017513	0.00897093	0.0631929	1.01767	0.99993	1.03572
IgD- CD24- %B cell	ebi-a-GCST90001413	0.0415618	0.0153232	0.00668077	1.04244	1.0116	1.07422	0.0420254	0.0197405	0.0529562	1.04292	1.00334	1.08406	0.0395691	0.0226799	0.0810406	1.04036	0.995128	1.08765	0.0732441	0.0345181	0.0521723	1.07599	1.0056	1.15131	0.0382651	0.0196483	0.0718166	1.03901	0.999754	1.0798
IgD+ CD24- AC	ebi-a-GCST90001416	0.0179117	0.00832183	0.0313683	1.01807	1.0016	1.03481	0.00884865	0.00951058	0.363835	1.00889	0.990256	1.02787	0.0129774	0.0107437	0.227079	1.01306	0.991952	1.03462	0.000765324	0.023763	0.974627	1.00077	0.955223	1.04848	0.0134342	0.00896553	0.149641	1.01352	0.99587	1.03149
CD11c+ CD62L- monocyte %monocyte	ebi-a-GCST90001453	-0.0644813	0.0286009	0.0241634	0.937554	0.886442	0.991612	-0.0656521	0.058917	0.282681	0.936457	0.834327	1.05109	-0.0388178	0.0357012	0.276906	0.961926	0.896917	1.03165	-0.0169979	0.060349	0.781814	0.983146	0.87347	1.10659	-0.0672111	0.0562085	0.249217	0.934998	0.837462	1.04389
Myeloid DC AC	ebi-a-GCST90001458	0.0428087	0.0126078	0.000685264	1.04374	1.01826	1.06985	0.0308344	0.0162179	0.0710791	1.03131	0.999048	1.06462	0.021401	0.0180465	0.23567	1.02163	0.986127	1.05841	0.0659159	0.0328686	0.0573707	1.06814	1.00149	1.13921	0.0314765	0.0165175	0.0698475	1.03198	0.999103	1.06593
DC AC	ebi-a-GCST90001461	0.0461813	0.0212615	0.0298508	1.04726	1.00452	1.09183	0.0985747	0.0359138	0.0138189	1.1036	1.02858	1.18408	0.0728376	0.0305942	0.0172769	1.07556	1.01296	1.14202	0.00390286	0.0571263	0.946284	1.00391	0.89757	1.12285	0.086847	0.0291501	0.00803895	1.09073	1.03016	1.15486
CD62L- myeloid DC AC	ebi-a-GCST90001468	0.0515163	0.0204372	0.0117117	1.05287	1.01153	1.0959	0.0721957	0.0334577	0.0488007	1.07487	1.00664	1.14771	0.0739628	0.0251766	0.00330588	1.07677	1.02492	1.13123	0.0822912	0.0575697	0.17338	1.08577	0.969916	1.21547	0.0809181	0.0243588	0.00464524	1.08428	1.03373	1.1373
CD62L- CD86+ myeloid DC AC	ebi-a-GCST90001472	0.0369623	0.0150355	0.0139578	1.03765	1.00752	1.06869	0.0235429	0.0205695	0.268254	1.02382	0.983367	1.06594	0.0458597	0.0210561	0.0294079	1.04693	1.0046	1.09104	0.0369346	0.0399771	0.367761	1.03763	0.959426	1.1222	0.0495649	0.0225462	0.0412422	1.05081	1.00539	1.09829
Activated & resting Treg %CD4+	ebi-a-GCST90001500	-0.0316341	0.0141506	0.0253829	0.968861	0.942359	0.996109	-0.0561319	0.0197627	0.00903993	0.945414	0.909494	0.982753	-0.0419524	0.0202386	0.0381826	0.958915	0.921622	0.997718	-0.015755	0.0330915	0.638134	0.984368	0.922549	1.05033	-0.0345453	0.0177618	0.0631143	0.966045	0.932992	1.00027
CD33dim HLA DR+ CD11b- AC	ebi-a-GCST90001527	0.0218814	0.0097215	0.0243966	1.02212	1.00283	1.04178	0.0148009	0.0119931	0.228634	1.01491	0.991332	1.03905	0.0138485	0.0130515	0.288661	1.01394	0.988336	1.04022	0.0209926	0.0236227	0.382333	1.02121	0.97501	1.06961	0.0179113	0.0107234	0.106858	1.01807	0.996898	1.0397
CD66b++ myeloid cell AC	ebi-a-GCST90001529	0.0448576	0.0179893	0.0126463	1.04588	1.00964	1.08341	0.0115511	0.0310648	0.715581	1.01162	0.951861	1.07513	0.0410295	0.0249462	0.100028	1.04188	0.992166	1.09409	0.0655041	0.0369606	0.0966554	1.0677	0.993085	1.14791	0.0393506	0.0309643	0.223143	1.04014	0.978887	1.10522
TD CD8br %T cell	ebi-a-GCST90001559	0.0455525	0.0178347	0.0106446	1.04661	1.01065	1.08384	0.0161916	0.0251016	0.528644	1.01632	0.967531	1.06758	0.0547882	0.0263934	0.0379096	1.05632	1.00306	1.1124	0.044487	0.0389695	0.270424	1.04549	0.96861	1.12847	0.0492407	0.0249196	0.0656619	1.05047	1.0004	1.10305
CD14- CD16+ monocyte AC	ebi-a-GCST90001579	-0.0369666	0.0137874	0.00733612	0.963708	0.938015	0.990106	-0.0382043	0.0173696	0.0439379	0.962516	0.9303	0.995849	-0.034657	0.0198078	0.0801756	0.965937	0.929155	1.00417	-0.0181226	0.0343234	0.604749	0.982041	0.918148	1.05038	-0.0345868	0.0184833	0.0797117	0.966004	0.931635	1.00164
CD14- CD16+ monocyte %monocyte	ebi-a-GCST90001584	-0.0531703	0.0234851	0.0235739	0.948218	0.905561	0.992886	-0.0351983	0.0346402	0.321712	0.965414	0.902043	1.03324	-0.0309213	0.0287512	0.28216	0.969552	0.916426	1.02576	-0.0510542	0.0539509	0.354753	0.950227	0.854877	1.05621	-0.030147	0.0399846	0.459241	0.970303	0.897164	1.0494
CD14+ CD16+ monocyte %monocyte	ebi-a-GCST90001585	-0.043526	0.0205975	0.034586	0.957408	0.919526	0.99685	-0.0588091	0.0372252	0.129094	0.942887	0.876542	1.01425	-0.0846462	0.0264769	0.00138874	0.918837	0.872371	0.967779	-0.0256831	0.0555617	0.648445	0.974644	0.87408	1.08678	-0.0830892	0.0268352	0.00527075	0.920269	0.873117	0.969968
CD14+ CD16- monocyte %monocyte	ebi-a-GCST90001586	0.0265698	0.00981697	0.00679939	1.02693	1.00736	1.04688	0.032821	0.0109689	0.0067149	1.03337	1.01139	1.05582	0.0298115	0.0133654	0.025715	1.03026	1.00362	1.05761	-0.0389779	0.0539146	0.476995	0.961772	0.865325	1.06897	0.0298148	0.0115696	0.016855	1.03026	1.00716	1.05389
HLA DR+ NK AC	ebi-a-GCST90001648	-0.0563224	0.0232093	0.0152362	0.945234	0.903199	0.989226	-0.109741	0.0372471	0.0106237	0.896067	0.832981	0.96393	-0.0867619	0.0282773	0.00215312	0.916895	0.86746	0.969148	-0.0722252	0.063764	0.275124	0.930321	0.821024	1.05417	-0.0902593	0.0274919	0.00502999	0.913694	0.865764	0.964278
CD28- CD8dim %T cell	ebi-a-GCST90001661	-0.0301753	0.0149696	0.043824	0.970275	0.942221	0.999165	-0.025719	0.0219494	0.253835	0.974609	0.93357	1.01745	-0.027115	0.0225879	0.229976	0.973249	0.931101	1.01731	-0.0491533	0.0339359	0.160998	0.952035	0.890771	1.01751	-0.0305845	0.0198331	0.136699	0.969878	0.9329	1.00832
CD19 on IgD+ CD24-	ebi-a-GCST90001725	-0.0172021	0.00872374	0.0486249	0.982945	0.966281	0.999896	-0.0269481	0.00974281	0.0109959	0.973412	0.955	0.992179	-0.0194041	0.0125221	0.121242	0.980783	0.957004	1.00515	0.0246831	0.0298887	0.417034	1.02499	0.966669	1.08683	-0.0205504	0.0100395	0.0517634	0.979659	0.960571	0.999127
CD19 on IgD+ CD38- naive	ebi-a-GCST90001727	-0.0267545	0.00855371	0.00176106	0.9736	0.957414	0.990061	-0.0255411	0.0102837	0.0237283	0.974782	0.955331	0.994629	-0.0282688	0.0126211	0.0251042	0.972127	0.948374	0.996475	-0.0372894	0.0268076	0.181183	0.963397	0.914084	1.01537	-0.0261764	0.00959149	0.0137715	0.974163	0.956021	0.99265
CD19 on IgD+	ebi-a-GCST90001741	-0.0171886	0.00856786	0.0448383	0.982958	0.966589	0.999605	-0.0259566	0.00981491	0.013928	0.974377	0.955812	0.993303	-0.0217117	0.0128121	0.0901459	0.978522	0.954256	1.00341	0.0379694	0.0268204	0.168734	1.0387	0.985507	1.09476	-0.0172833	0.00998198	0.0952235	0.982865	0.963823	1.00228
CD24 on memory B cell	ebi-a-GCST90001771	-0.0261931	0.0106703	0.0140973	0.974147	0.953986	0.994735	-0.0214687	0.0138964	0.134008	0.97876	0.952462	1.00578	-0.014426	0.0153362	0.346883	0.985678	0.95649	1.01576	-0.00824449	0.0279852	0.770472	0.991789	0.938854	1.04771	-0.0106353	0.0132303	0.428253	0.989421	0.964094	1.01541
CD3 on CD39+ activated Treg	ebi-a-GCST90001854	-0.0401752	0.0157411	0.0107029	0.960621	0.931436	0.990721	-0.0516893	0.0271372	0.0693938	0.949624	0.900434	1.0015	-0.0355288	0.023601	0.132223	0.965095	0.921468	1.01079	-0.0398811	0.0423477	0.355702	0.960904	0.884367	1.04406	0.0136353	0.0573934	0.814226	1.01373	0.905873	1.13443
HVEM on EM CD4+	ebi-a-GCST90001878	-0.0428811	0.0168627	0.0109921	0.958025	0.926879	0.990218	-0.0247897	0.0447292	0.58625	0.975515	0.893634	1.0649	-0.0365405	0.0219258	0.0956032	0.964119	0.923564	1.00645	-0.00395237	0.0482065	0.935514	0.996055	0.906253	1.09476	-0.0989078	0.0481396	0.0539327	0.905826	0.824267	0.995456
CCR7 on naive CD8br	ebi-a-GCST90001908	0.0356466	0.0157023	0.0231981	1.03629	1.00488	1.06868	0.0161601	0.0251499	0.527157	1.01629	0.967409	1.06764	0.0312645	0.0233189	0.180005	1.03176	0.985663	1.08001	0.0427865	0.0340954	0.222115	1.04372	0.976246	1.11585	0.0274988	0.026871	0.316779	1.02788	0.975146	1.08347
CD45 on CD8br	ebi-a-GCST90001917	0.0110489	0.00435673	0.0112113	1.01111	1.00251	1.01978	0.0142904	0.00470099	0.00581834	1.01439	1.00509	1.02378	0.0116248	0.00599017	0.0523017	1.01169	0.999884	1.02364	0.0130508	0.0072685	0.0851736	1.01314	0.998805	1.02767	0.0130508	0.00538047	0.0231722	1.01314	1.00251	1.02388
FSC-A on HLA DR+ CD8br	ebi-a-GCST90001978	-0.0215035	0.0109421	0.0493899	0.978726	0.957959	0.999943	-0.0177183	0.0133964	0.207165	0.982438	0.956978	1.00858	-0.00962369	0.015557	0.536175	0.990422	0.960679	1.02109	-0.00877502	0.0198549	0.664825	0.991263	0.953429	1.0306	-0.00877502	0.0137558	0.533148	0.991263	0.964895	1.01835
CCR2 on monocyte	ebi-a-GCST90002017	-0.0550681	0.0163289	0.000745092	0.946421	0.91661	0.977201	-0.0725684	0.0328671	0.0374923	0.930002	0.871981	0.991884	-0.063663	0.0248235	0.0103287	0.938321	0.893761	0.985103	-0.0598985	0.0463222	0.208291	0.94186	0.860114	1.03138	-0.082861	0.0275988	0.00617131	0.920479	0.87201	0.971642
CD4 on CM CD4 +	ebi-a-GCST90002023	-0.0400157	0.0195821	0.0410049	0.960774	0.924598	0.998367	-0.0171866	0.0396913	0.672108	0.98296	0.90939	1.06248	-0.0305873	0.0259571	0.238647	0.969876	0.921767	1.0205	-0.035152	0.037326	0.362285	0.965459	0.897349	1.03874	-0.0295256	0.029233	0.329628	0.970906	0.91684	1.02816
CD4 on CD45RA+ CD4+	ebi-a-GCST90002027	-0.0377836	0.0164348	0.0215048	0.962921	0.932398	0.994444	-0.0240502	0.0320628	0.460488	0.976237	0.916775	1.03956	-0.028685	0.0242951	0.237725	0.971722	0.926535	1.01911	-0.0356591	0.037013	0.344563	0.964969	0.897444	1.03758	-0.0315927	0.0264748	0.243949	0.968901	0.919907	1.02051
CD39 on CD39+ CD8br	ebi-a-GCST90002029	-0.0445007	0.0209273	0.0334662	0.956475	0.918036	0.996523	-0.0395844	0.0445589	0.384409	0.961189	0.880804	1.04891	-0.0276543	0.0264785	0.296299	0.972725	0.92353	1.02454	-0.00519519	0.0426872	0.904238	0.994818	0.914972	1.08163	-0.0262906	0.0298701	0.388284	0.974052	0.918663	1.03278
CD80 on granulocyte	ebi-a-GCST90002040	0.0291578	0.014391	0.0427531	1.02959	1.00095	1.05904	0.0302385	0.0218032	0.175696	1.0307	0.987582	1.0757	0.0310264	0.0188019	0.0989077	1.03151	0.994192	1.07023	0.0195235	0.0335999	0.565403	1.01972	0.954725	1.08913	0.0195235	0.0163068	0.240282	1.01972	0.987639	1.05283
CD45 on CD33dim HLA DR-	ebi-a-GCST90002050	-0.035737	0.0156876	0.0227244	0.964894	0.935677	0.995023	-0.0150442	0.0303266	0.627033	0.985068	0.928222	1.0454	-0.0183869	0.0217708	0.398351	0.981781	0.940769	1.02458	-0.0145231	0.0339532	0.674543	0.985582	0.922128	1.0534	-0.0115579	0.0246778	0.64585	0.988509	0.941834	1.0375
CD45RA on TD CD8br	ebi-a-GCST90002101	-0.0877666	0.0253792	0.000543767	0.915975	0.871526	0.96269	-0.00992433	0.0519617	0.851724	0.990125	0.894251	1.09628	-0.0757511	0.034746	0.029247	0.927047	0.866015	0.99238	-0.0945012	0.0513971	0.0889155	0.909827	0.822638	1.00626	-0.0642727	0.0398277	0.130577	0.937749	0.867331	1.01389
