# Supplementary material for: Assessing the causal role of immune traits in rheumatoid arthritis by bidirectional Mendelian randomization analysis
Source: Aging (Albany NY). 2024 May 16;16(10):8687–96. doi: 10.18632/aging.205833 (PMC11164524; doi:10.18632/aging.205833)
Supplement: Supplementary Table 3 [file aging-16-205833-s003.xlsx]

## Sheet: Sheet1
Supplementary Table 3. Heterogeneity and pleiotropy analyses of identified immune traits on RA.
Trait	Id	Heterogeneity analysis				Pleiotropy analysis
		Methods	Q	Q value	p-val	Egger intercept	SE	p-val
IgD+ CD38dim AC	ebi-a-GCST90001394	MR Egger	23.2634	22	0.386988	-0.00138615	0.00568973	0.80978
		IVW	23.3261	23	0.441868
IgD- CD24- %B cell	ebi-a-GCST90001413	MR Egger	13.4479	13	0.413843	-0.000355874	0.00930214	0.970064
		IVW	13.4494	14	0.491484
IgD+ CD24- AC	ebi-a-GCST90001416	MR Egger	19.0547	19	0.453333	0.0112304	0.00649417	0.0999698
		IVW	22.0538	20	0.3376
CD11c+ CD62L- monocyte %monocyte	ebi-a-GCST90001453	MR Egger	22.7056	15	0.0905934	0.000313926	0.0136683	0.981979
		IVW	22.7064	16	0.121811
Myeloid DC AC	ebi-a-GCST90001458	MR Egger	24.0868	21	0.28887	0.00741956	0.00639516	0.258994
		IVW	25.6307	22	0.267874
DC AC	ebi-a-GCST90001461	MR Egger	14.7874	17	0.610795	-0.0150376	0.00831451	0.0882359
		IVW	18.0584	18	0.451813
CD62L- myeloid DC AC	ebi-a-GCST90001468	MR Egger	16.9109	14	0.260959	-0.00790021	0.0100414	0.444536
		IVW	17.6586	15	0.281041
CD62L- CD86+ myeloid DC AC	ebi-a-GCST90001472	MR Egger	19.9945	17	0.274511	0.00802452	0.008372	0.351248
		IVW	21.075	18	0.275645
Activated & resting Treg %CD4+	ebi-a-GCST90001500	MR Egger	19.3225	24	0.734579	0.0109847	0.00618594	0.0884575
		IVW	22.4758	25	0.608145
CD33dim HLA DR+ CD11b- AC	ebi-a-GCST90001527	MR Egger	28.7421	25	0.274839	0.00545341	0.00541239	0.32331
		IVW	29.9093	26	0.271385
CD66b++ myeloid cell AC	ebi-a-GCST90001529	MR Egger	4.98138	14	0.98607	0.0117315	0.00892057	0.209608
		IVW	6.71088	15	0.965182
TD CD8br %T cell	ebi-a-GCST90001559	MR Egger	15.2204	15	0.435659	0.01189	0.00746579	0.132102
		IVW	17.794	16	0.336094
CD14- CD16+ monocyte AC	ebi-a-GCST90001579	MR Egger	12.948	15	0.606312	0.000849432	0.0072502	0.908288
		IVW	12.9618	16	0.675552
CD14- CD16+ monocyte %monocyte	ebi-a-GCST90001584	MR Egger	30.9682	20	0.055611	-0.00589568	0.00826772	0.484024
		IVW	31.7556	21	0.0619692
CD14+ CD16+ monocyte %monocyte	ebi-a-GCST90001585	MR Egger	27.948	21	0.141631	0.00584553	0.0117667	0.6245
		IVW	28.2765	22	0.166698
CD14+ CD16- monocyte %monocyte	ebi-a-GCST90001586	MR Egger	28.186	22	0.1696	-0.00760408	0.00620304	0.233211
		IVW	30.1112	23	0.146235
HLA DR+ NK AC	ebi-a-GCST90001648	MR Egger	13.1767	14	0.512656	0.0152987	0.00856189	0.095629
		IVW	16.3695	15	0.357928
CD28- CD8dim %T cell	ebi-a-GCST90001661	MR Egger	21.7324	22	0.475953	-0.00170179	0.00613019	0.783905
		IVW	21.8095	23	0.531775
CD19 on IgD+ CD24-	ebi-a-GCST90001725	MR Egger	22.5961	23	0.484555	0.0100203	0.005194	0.0661343
		IVW	26.3179	24	0.337236
CD19 on IgD+ CD38- naive	ebi-a-GCST90001727	MR Egger	19.3782	17	0.307261	-0.00128917	0.00567384	0.822969
		IVW	19.437	18	0.365388
CD19 on IgD+	ebi-a-GCST90001741	MR Egger	25.4029	25	0.439985	0.00865455	0.00518867	0.107801
		IVW	28.2299	26	0.34724
CD24 on memory B cell	ebi-a-GCST90001771	MR Egger	23.7597	27	0.643607	-0.00280244	0.00528089	0.599982
		IVW	24.0414	28	0.67935
CD3 on CD39+ activated Treg	ebi-a-GCST90001854	MR Egger	33.0277	23	0.0805849	0.00458915	0.00874064	0.604583
		IVW	33.4236	24	0.0954471
HVEM on EM CD4+	ebi-a-GCST90001878	MR Egger	24.6332	18	0.135357	-0.00582241	0.0132841	0.666383
		IVW	24.8961	19	0.163989
CCR7 on naive CD8br	ebi-a-GCST90001908	MR Egger	19.2006	22	0.632911	0.00684999	0.00690599	0.332036
		IVW	20.1844	23	0.630762
CD45 on CD8br	ebi-a-GCST90001917	MR Egger	22.4468	23	0.493433	-0.00869297	0.00533218	0.116661
		IVW	25.1046	24	0.400092
FSC-A on HLA DR+ CD8br	ebi-a-GCST90001978	MR Egger	14.1878	14	0.435817	-0.00371338	0.00747944	0.627262
		IVW	14.4376	15	0.492634
CCR2 on monocyte	ebi-a-GCST90002017	MR Egger	22.5801	23	0.485505	0.00592403	0.00965561	0.545544
		IVW	22.9565	24	0.522369
CD4 on CM CD4 +	ebi-a-GCST90002023	MR Egger	5.84376	13	0.951655	-0.00613513	0.00927815	0.520003
		IVW	6.281	14	0.958904
CD4 on CD45RA+ CD4+	ebi-a-GCST90002027	MR Egger	20.5722	24	0.663815	-0.00395237	0.00792302	0.622429
		IVW	20.8211	25	0.702544
CD39 on CD39+ CD8br	ebi-a-GCST90002029	MR Egger	29.5757	21	0.100851	-0.00133305	0.0105959	0.90108
		IVW	29.598	22	0.128566
CD80 on granulocyte	ebi-a-GCST90002040	MR Egger	39.4986	30	0.114947	-0.000416957	0.00623758	0.947148
		IVW	39.5045	31	0.140601
CD45 on CD33dim HLA DR-	ebi-a-GCST90002050	MR Egger	14.7123	15	0.472336	-0.00910408	0.0114187	0.43772
		IVW	15.3479	16	0.499318
CD45RA on TD CD8br	ebi-a-GCST90002101	MR Egger	6.23164	12	0.903958	-0.0207035	0.0120596	0.111696
		IVW	9.17894	13	0.759298
