# Supplementary material for: Assessing the causal role of immune traits in rheumatoid arthritis by bidirectional Mendelian randomization analysis
Source: Aging (Albany NY). 2024 May 16;16(10):8687–96. doi: 10.18632/aging.205833 (PMC11164524; doi:10.18632/aging.205833)
Supplement: Supplementary Table 4 [file aging-16-205833-s004.xlsx]

## Sheet: Sheet1
Supplementary Table 4. Sensitive analysis for causal associations of RA on immune traits.
Trait type	Panel	Statistical trait name	Trait	Id	IVW						MR-Egger						Weighted median						Simple mode						Weighted mode
					BETA	SE	p-val	OR	OR-L95%CI	OR-U95%CI	BETA	SE	p-val	OR	OR-L95%CI	OR-U95%CI	BETA	SE	p-val	OR	OR-L95%CI	OR-U95%CI	BETA	SE	p-val	OR	OR-L95%CI	OR-U95%CI	BETA	SE	p-val	OR	OR-L95%CI	OR-U95%CI
Absolute count	cDC	f_DC_Trait516	CD62L- myeloid DC AC	ebi-a-GCST90001468	0.0678655	0.0335433	0.0430503	1.07022	1.00212	1.14295	0.0446423	0.0520433	0.411095	1.04565	0.944252	1.15795	0.0521777	0.0384809	0.175119	1.05356	0.977023	1.1361	0.0864336	0.0891113	0.352915	1.09028	0.915555	1.29835	0.054115	0.0394598	0.197578	1.05561	0.977041	1.14049
MFI	Treg	Blue.530.30.Treg.trait13	CD3 on secreting Treg	ebi-a-GCST90001855	-0.0775594	0.0321508	0.0158493	0.925372	0.868859	0.985561	-0.100239	0.0501211	0.0733959	0.904621	0.819979	0.998	-0.0863779	0.039645	0.0293477	0.917248	0.848672	0.991364	-0.0243952	0.0729227	0.744268	0.9759	0.845926	1.12584	-0.0855622	0.0366814	0.0396882	0.917996	0.854313	0.986426
MFI	Treg	Blue.530.30.Treg.trait15	CD3 on activated & secreting Treg	ebi-a-GCST90001857	-0.0803439	0.0322233	0.0126546	0.922799	0.866319	0.982961	-0.104789	0.0502106	0.063448	0.900514	0.816113	0.993644	-0.0768428	0.0405945	0.0583663	0.926035	0.85521	1.00273	-0.0056272	0.0794876	0.944833	0.994389	0.850932	1.16203	-0.0849466	0.0369409	0.0420669	0.918561	0.854404	0.987536
MFI	Treg	Blue.530.30.Treg.trait8	CD3 on CD4 Treg	ebi-a-GCST90001868	-0.346358	0.137831	0.0119739	0.707259	0.539826	0.926623	-0.889876	0.417419	0.279223	0.410707	0.181225	0.930778	-0.280922	0.171988	0.102389	0.755087	0.539012	1.05778	-0.236146	0.207425	0.372925	0.789665	0.525871	1.18579	-0.241369	0.196052	0.343398	0.785552	0.534924	1.15361
