# Supplementary material for: Assessing the causal role of immune traits in rheumatoid arthritis by bidirectional Mendelian randomization analysis
Source: Aging (Albany NY). 2024 May 16;16(10):8687–96. doi: 10.18632/aging.205833 (PMC11164524; doi:10.18632/aging.205833)
Supplement: Supplementary Table 5 [file aging-16-205833-s005.xlsx]

## Sheet: Sheet1
Supplementary Table 5. Heterogeneity and pleiotropy analyses of RA on immune traits.
Trait	Id	Heterogeneity analysis				Pleiotropy analysis
		Methods	Q	Q value	p-val	Egger intercept	SE	p-val
CD62L- myeloid DC AC	ebi-a-GCST90001468	MR Egger	10.0403657302961	10	0.436959027100087	0.00931853784970085	0.0159438130153744	0.571859267185573
		IVW	10.3833393326092	11	0.496270484496146
CD3 on secreting Treg	ebi-a-GCST90001855	MR Egger	8.43956024968542	10	0.585983164494084	0.00941153667505334	0.0159562597725521	0.568389387806118
		IVW	8.78746381675996	11	0.641503048121676
CD3 on activated and secreting Treg	ebi-a-GCST90001857	MR Egger	9.6460668501437	10	0.472074107558871	0.0101287171027067	0.0159547118405851	0.539784041211419
		IVW	10.0490908910883	11	0.525976872156014
CD3 on CD4 Treg	ebi-a-GCST90001868	MR Egger	0.194618636343125	1	0.659100048139234	0.0856847770821751	0.0622741578092825	0.400099790350027
		IVW	2.08779736699577	2	0.352079356743885
